# Supplementary material
Source: PubMed Central journal article supplement (PMC1797307)
Supplement: jbacter_189_3_717__1.pdf [file jbacter_189_3_717__1.pdf]

**Supplementary Table 1.** Sequences of oligonucleotides primers used in this study. Restriction sites are indicated by underlines.

| Name           | DNA sequence (5'-3')                         |
|----------------|----------------------------------------------|
| tcpA_del_A     | CATGCCATGGTTCCTTGTGCCTGCTGAGAAC              |
| tcpA_del_B     | TTCCTGGTGCTCCCTCTTGACCGGTTTTCTT              |
| tcpA_del_C     | TCAAGAGGGAGCACCAGGAAGTGCCAACT                |
| tcpA_del_D     | GCTCTAGAGTGAGAATTCAAACACTGACTCCCAA           |
| tcpP_del_A     | CATGCCATGGTTCCTTGTGCCTGCTGAGAAC              |
| tcpP_del_B     | CTGATGTTGAGCATTTCATTCCACCAAAGGT              |
| tcpP_del_C     | GAATGAATGCTCAACATCAGTGTTCCGTGA               |
| tcpP_del_D     | CTAGTCTAGACTACGTGATCTGGTGCGACA               |
| flaA_lacZ_5'   | CCGGAATTCGAATACGGCCAAACTGCATC                |
| flaA_lacZ_3'   | CGCGGATCCGGTTGTTTCGGCAATAAAGGA               |
| ctxA_lacZ_5'   | CCGGAATTCCTTACAGGGGGAAATGATGC                |
| ctxA_lacZ_3'   | CGCGGATCCGAGGTCTAGAATCTGCCCCGATA             |
| tcpA_lacZ_5'   | CCGGAATTCGCTCCTCCACAGTCAAAGT                 |
| tcpA_lacZ_3'   | CGCGGATCCACACCCATAATACCCAGAACA               |
| tcpP_lacZ_5'   | CCGGAATTCACGTAATGATGCACGCAAG                 |
| tcpP_lacZ_3'   | CGCGGATCCCAATCAGCCTTTCTGGCTTC                |
| toxT_lacZ_5'   | CCGGAATTCCTCACATGCAGAAACAGGAG                |
| toxT_lacZ_3'   | CGCGGATCCTTGCAATTCCTACTATCTATCCAGA           |
| VCA0785_pBAD_A | CCGCTCGAGAATGGCACCGATCCTTTCACAC              |
| VCA0785_pBAD_D | GCTCTAGATACGCCAGAGCGTGGCTTTCGAG              |
| VCA0785_AAL_B  | CGGATGCTTCCAACGCAACAATGCGGCAGCACCGACCCAGCGC  |
| VCA0785_AAL_C  | GCGCTGGGTTCGGTGCTGCCGCATTGTTGCGTTGGAAGCATCCG |

**Supplementary Table 1.** Functional categories of the genes differentially regulated in the  $\Delta cdgC$  mutant compared to the rugose wild type during the exponential and stationary phases.<sup>a</sup>

| Category <sup>b</sup>                                     | Exponential |           | Stationary |           |
|-----------------------------------------------------------|-------------|-----------|------------|-----------|
|                                                           | Induced     | Repressed | Induced    | Repressed |
| Amino Acid Biosynthesis                                   | 2           | 21        | 8          | 0         |
| Biosynthesis of Cofactors, Prosthetic Groups and Carriers | 0           | 2         | 3          | 1         |
| Cell Envelope                                             | 3           | 4         | 12         | 0         |
| Cellular Processes                                        | 11          | 40        | 15         | 1         |
| Central Intermediary Metabolism                           | 3           | 11        | 6          | 0         |
| DNA Metabolism                                            | 3           | 2         | 4          | 0         |
| Energy Metabolism                                         | 12          | 52        | 25         | 0         |
| Fatty Acid and Phospholipid Metabolism                    | 1           | 6         | 4          | 0         |
| Hypothetical Proteins                                     | 74          | 105       | 77         | 5         |
| Protein Fate                                              | 7           | 4         | 15         | 0         |
| Protein Synthesis                                         | 2           | 1         | 2          | 4         |
| Purines, Pyrimidines, Nucleosides and Nucleotides         | 8           | 15        | 9          | 0         |
| Regulatory Functions                                      | 11          | 12        | 10         | 0         |
| Transcription                                             | 2           | 0         | 4          | 0         |
| Transport and Binding Proteins                            | 18          | 35        | 12         | 1         |
| Unknown Function                                          | 5           | 12        | 11         | 2         |
| Other Categories                                          | 5           | 1         | 7          | 0         |
| Total                                                     | 167         | 323       | 224        | 14        |

<sup>a</sup>Differentially expressed genes were determined using SAM software with  $\geq 1.5$  fold change in gene expression and False Discovery Rate (FDR)  $\leq 3\%$  as criteria.

<sup>b</sup>Categories are as defined in the TIGR database for *Vibrio cholerae* strain N16961

**Supplementary Table 3.** Genes that are differentially expressed in *RΔcdgC* compared to wild-type rugose during both exponential and stationary phases of growth. Differentially expressed genes were determined using SAM software with  $\geq 1.5$  fold change in gene expression and False Discovery Rate (FDR)  $\leq 3\%$  as a criteria.

| Gene ID | Exponential | Stationary |
|---------|-------------|------------|
| VC0004  | -           | 1.82       |
| VC0005  | 1.60        | -          |
| VC0006  | 1.67        | -          |
| VC0010  | 1.72        | -          |
| VC0025  | 0.58        | 1.66       |
| VC0026  | -           | 1.61       |
| VC0034  | -           | 3.21       |
| VC0038  | 0.67        | -          |
| VC0040  | -           | 0.57       |
| VC0050  | 1.64        | -          |
| VC0051  | 0.52        | -          |
| VC0052  | 0.62        | -          |
| VC0075  | -           | 0.58       |
| VC0076  | 0.53        | -          |
| VC0086  | -           | 1.56       |
| VC0102  | 0.47        | -          |
| VC0105  | -           | 2.08       |
| VC0112  | 0.56        | -          |
| VC0130  | 0.62        | -          |
| VC0134  | -           | 1.56       |
| VC0151  | 0.64        | -          |
| VC0157  | 2.81        | 3.02       |
| VC0162  | 0.52        | 1.53       |
| VC0168  | -           | 1.79       |
| VC0170  | 0.52        | -          |
| VC0171  | 0.22        | -          |
| VC0172  | 0.21        | -          |
| VC0173  | 0.46        | -          |
| VC0175  | 0.54        | 1.98       |
| VC0176  | -           | 1.67       |
| VC0193  | 1.83        | -          |
| VC0206  | -           | 2.24       |
| VC0254  | 1.55        | -          |
| VC0261  | 1.53        | -          |
| VC0273  | 1.52        | -          |
| VC0274  | 2.58        | -          |
| VC0276  | 0.56        | -          |
| VC0278  | 1.70        | -          |
| VC0290  | 1.87        | -          |
| VC0291  | 1.96        | -          |
| VC0292  | 1.89        | -          |
| VC0295  | -           | 1.51       |

| Gene ID | Exponential | Stationary |
|---------|-------------|------------|
| VC0296  | -           | 1.51       |
| VC0307  | -           | 1.70       |
| VC0328  | -           | 2.42       |
| VC0330  | 0.50        | -          |
| VC0345  | -           | 1.89       |
| VC0347  | 0.63        | -          |
| VC0348  | -           | 1.85       |
| VC0349  | -           | 2.41       |
| VC0354  | -           | 3.34       |
| VC0363  | 1.60        | -          |
| VC0391  | 0.57        | -          |
| VC0395  | -           | 1.93       |
| VC0402  | 0.61        | -          |
| VC0423  | 0.32        | -          |
| VC0430  | -           | 1.76       |
| VC0432  | 0.44        | -          |
| VC0443  | 1.57        | -          |
| VC0446  | -           | 1.79       |
| VC0448  | 1.71        | -          |
| VC0451  | 1.53        | -          |
| VC0452  | 1.61        | -          |
| VC0453  | 1.53        | -          |
| VC0465  | 0.53        | -          |
| VC0475  | 0.57        | -          |
| VC0481  | 0.62        | -          |
| VC0483  | -           | 1.73       |
| VC0485  | -           | 1.69       |
| VC0487  | 1.68        | 2.40       |
| VC0490  | 0.55        | 1.65       |
| VC0491  | 0.59        | 2.33       |
| VC0492  | -           | 2.16       |
| VC0506  | 2.19        | -          |
| VC0507  | 1.67        | -          |
| VC0519  | 2.20        | -          |
| VC0520  | 1.72        | -          |
| VC0533  | 0.42        | -          |
| VC0542  | -           | 1.71       |
| VC0543  | -           | 2.23       |
| VC0548  | 0.66        | -          |
| VC0549  | 0.37        | -          |
| VC0551  | 0.60        | -          |
| VC0557  | 0.58        | -          |

| Gene ID | Exponential | Stationary |
|---------|-------------|------------|
| VC0558  | -           | 2.42       |
| VC0566  | -           | 2.18       |
| VC0571  | -           | 0.43       |
| VC0578  | -           | 2.26       |
| VC0583  | 0.38        | -          |
| VC0604  | 0.35        | -          |
| VC0608  | 0.65        | -          |
| VC0626  | -           | 1.91       |
| VC0628  | 0.35        | -          |
| VC0629  | 0.52        | -          |
| VC0633  | 0.64        | 1.84       |
| VC0635  | 2.06        | -          |
| VC0642  | -           | 1.62       |
| VC0648  | -           | 1.67       |
| VC0658  | 1.59        | -          |
| VC0667  | 0.50        | -          |
| VC0678  | -           | 1.52       |
| VC0679  | 1.68        | 0.41       |
| VC0706  | 0.52        | -          |
| VC0708  | 1.86        | -          |
| VC0730  | 0.56        | -          |
| VC0731  | -           | 2.79       |
| VC0733  | 0.33        | -          |
| VC0737  | 0.67        | -          |
| VC0749  | -           | 1.66       |
| VC0756  | -           | 1.84       |
| VC0763  | -           | 1.62       |
| VC0786  | 0.56        | 1.93       |
| VC0804  | 1.79        | -          |
| VC0824  | -           | 1.70       |
| VC0826  | 1.62        | 1.69       |
| VC0827  | 1.52        | -          |
| VC0828  | 0.53        | 1.99       |
| VC0844  | -           | 1.79       |
| VC0847  | -           | 1.99       |
| VC0851  | 1.58        | -          |
| VC0855  | -           | 1.86       |
| VC0857  | 0.54        | -          |
| VC0869  | 0.27        | -          |
| VC0883  | 0.35        | -          |
| VC0895  | 0.49        | -          |
| VC0905  | 0.46        | 1.95       |
| VC0916  | 1.55        | 2.93       |
| VC0917  | -           | 2.02       |
| VC0918  | -           | 2.59       |
| VC0919  | -           | 2.28       |
| VC0921  | 1.51        | -          |

| Gene ID | Exponential | Stationary |
|---------|-------------|------------|
| VC0922  | -           | 2.97       |
| VC0924  | -           | 1.99       |
| VC0925  | -           | 2.74       |
| VC0926  | -           | 4.09       |
| VC0928  | -           | 3.84       |
| VC0929  | -           | 2.09       |
| VC0930  | 1.96        | 4.06       |
| VC0931  | 1.76        | -          |
| VC0932  | 1.50        | 5.17       |
| VC0933  | 1.62        | 5.55       |
| VC0935  | 1.92        | 7.81       |
| VC0936  | 1.92        | 2.20       |
| VC0937  | 1.87        | -          |
| VC0938  | 1.50        | -          |
| VC0939  | 1.94        | -          |
| VC0941  | 0.50        | 2.23       |
| VC0942  | -           | 1.53       |
| VC0947  | 1.56        | -          |
| VC0953  | -           | 1.91       |
| VC0957  | 0.58        | -          |
| VC0961  | -           | 1.93       |
| VC0965  | -           | 2.39       |
| VC0972  | 1.88        | -          |
| VC0973  | -           | 2.10       |
| VC0975  | 0.54        | -          |
| VC0976  | 0.56        | 1.58       |
| VC0977  | -           | 1.68       |
| VC0983  | -           | 1.83       |
| VC0985  | -           | 1.76       |
| VC0991  | 0.11        | -          |
| VC0996  | -           | 2.12       |
| VC1000  | -           | 1.85       |
| VC1004  | 0.49        | -          |
| VC1008  | 0.56        | -          |
| VC1010  | -           | 1.67       |
| VC1022  | -           | 1.53       |
| VC1034  | 2.16        | -          |
| VC1044  | -           | 2.24       |
| VC1046  | 0.60        | -          |
| VC1047  | 0.61        | -          |
| VC1048  | -           | 1.56       |
| VC1051  | 1.72        | -          |
| VC1052  | 2.31        | -          |
| VC1061  | 0.20        | -          |
| VC1064  | -           | 1.77       |
| VC1080  | 0.33        | -          |
| VC1081  | 0.56        | -          |

| Gene ID | Exponential | Stationary |
|---------|-------------|------------|
| VC1082  | 0.51        | -          |
| VC1091  | 0.24        | 3.15       |
| VC1092  | 0.31        | -          |
| VC1093  | 0.33        | -          |
| VC1094  | 0.24        | -          |
| VC1095  | 0.21        | -          |
| VC1119  | 0.53        | -          |
| VC1126  | -           | 2.29       |
| VC1129  | 1.52        | -          |
| VC1137  | 0.63        | -          |
| VC1139  | 0.63        | -          |
| VC1141  | 0.35        | -          |
| VC1142  | 0.22        | -          |
| VC1148  | -           | 1.51       |
| VC1149  | -           | 1.90       |
| VC1150  | 0.58        | 1.92       |
| VC1151  | 0.67        | -          |
| VC1158  | -           | 1.56       |
| VC1168  | 0.56        | -          |
| VC1169  | -           | 1.84       |
| VC1183  | 0.62        | -          |
| VC1184  | 0.64        | -          |
| VC1190  | 0.37        | 1.54       |
| VC1191  | 0.54        | 1.65       |
| VC1194  | 0.47        | -          |
| VC1195  | -           | 1.78       |
| VC1197  | -           | 2.05       |
| VC1198  | 0.49        | -          |
| VC1205  | 2.09        | -          |
| VC1211  | 1.91        | -          |
| VC1223  | 2.16        | -          |
| VC1228  | 0.46        | -          |
| VC1231  | 4.56        | -          |
| VC1242  | 0.54        | -          |
| VC1249  | 0.46        | -          |
| VC1256  | -           | 1.88       |
| VC1261  | -           | 0.52       |
| VC1277  | 0.61        | -          |
| VC1281  | 0.65        | -          |
| VC1293  | 0.29        | 1.58       |
| VC1297  | -           | 2.07       |
| VC1300  | 1.90        | -          |
| VC1301  | -           | 2.15       |
| VC1313  | 1.77        | -          |
| VC1317  | 1.51        | -          |
| VC1329  | 2.99        | -          |
| VC1331  | 1.51        | -          |

| Gene ID | Exponential | Stationary |
|---------|-------------|------------|
| VC1357  | 2.60        | -          |
| VC1368  | 0.67        | -          |
| VC1384  | 0.59        | 1.50       |
| VC1413  | 0.21        | -          |
| VC1414  | 0.42        | -          |
| VC1415  | 0.40        | 2.56       |
| VC1416  | 0.59        | -          |
| VC1417  | -           | 1.95       |
| VC1418  | 1.83        | -          |
| VC1419  | 1.54        | -          |
| VC1420  | 1.91        | -          |
| VC1421  | 0.56        | -          |
| VC1422  | 1.88        | -          |
| VC1424  | -           | 1.93       |
| VC1428  | -           | 1.92       |
| VC1439  | 0.61        | -          |
| VC1440  | 0.60        | -          |
| VC1441  | 0.59        | -          |
| VC1442  | 0.58        | -          |
| VC1447  | 1.75        | -          |
| VC1448  | 1.89        | -          |
| VC1449  | 2.31        | -          |
| VC1450  | 2.56        | -          |
| VC1451  | 1.70        | -          |
| VC1470  | -           | 1.74       |
| VC1490  | -           | 1.81       |
| VC1492  | 0.64        | -          |
| VC1494  | 0.57        | -          |
| VC1509  | 0.58        | -          |
| VC1510  | 0.63        | -          |
| VC1512  | 0.66        | -          |
| VC1514  | 0.53        | -          |
| VC1538  | 0.63        | -          |
| VC1539  | 0.63        | -          |
| VC1548  | -           | 1.53       |
| VC1559  | 0.55        | -          |
| VC1567  | 1.60        | -          |
| VC1573  | 1.99        | -          |
| VC1575  | 1.71        | -          |
| VC1576  | 1.88        | -          |
| VC1579  | 1.55        | -          |
| VC1585  | -           | 4.28       |
| VC1586  | 1.79        | -          |
| VC1587  | -           | 3.19       |
| VC1589  | 0.45        | -          |
| VC1590  | 0.50        | -          |
| VC1591  | 0.53        | -          |

| Gene ID | Exponential | Stationary |
|---------|-------------|------------|
| VC1598  | 2.01        | -          |
| VC1599  | 0.43        | -          |
| VC1600  | -           | 1.55       |
| VC1611  | 0.63        | -          |
| VC1620  | .30         | -          |
| VC1633  | -           | 1.59       |
| VC1644  | 1.81        | -          |
| VC1645  | -           | 1.60       |
| VC1649  | 2.06        | -          |
| VC1655  | 2.02        | -          |
| VC1658  | 1.89        | -          |
| VC1669  | 1.59        | -          |
| VC1671  | 0.63        | 1.90       |
| VC1672  | 1.92        | -          |
| VC1690  | 0.43        | -          |
| VC1696  | -           | 1.64       |
| VC1699  | 0.47        | -          |
| VC1701  | 1.95        | 2.23       |
| VC1722  | 1.83        | -          |
| VC1725  | 1.65        | -          |
| VC1727  | 0.52        | -          |
| VC1738  | -           | 1.76       |
| VC1739  | -           | 2.18       |
| VC1742  | 1.61        | -          |
| VC1748  | 2.01        | -          |
| VC1749  | 1.75        | -          |
| VC1754  | 0.56        | -          |
| VC1778  | 0.54        | -          |
| VC1779  | 0.39        | -          |
| VC1781  | 0.66        | -          |
| VC1820  | 0.27        | -          |
| VC1821  | 0.22        | -          |
| VC1823  | -           | 1.52       |
| VC1827  | 0.18        | -          |
| VC1828  | 0.50        | -          |
| VC1829  | 1.63        | -          |
| VC1834  | -           | 1.82       |
| VC1836  | -           | 1.75       |
| VC1838  | 1.66        | 1.51       |
| VC1841  | 1.86        | 0.65       |
| VC1844  | 1.54        | -          |
| VC1859  | 0.33        | -          |
| VC1860  | -           | 3.35       |
| VC1861  | 0.36        | -          |
| VC1862  | 0.26        | -          |
| VC1863  | 0.38        | 1.56       |
| VC1864  | 0.46        | -          |

| Gene ID | Exponential | Stationary |
|---------|-------------|------------|
| VC1866  | -           | 1.57       |
| VC1869  | -           | 1.66       |
| VC1872  | 0.30        | -          |
| VC1874  | 0.42        | -          |
| VC1887  | -           | 1.53       |
| VC1888  | 1.81        | 2.81       |
| VC1892  | 0.56        | 1.56       |
| VC1898  | 0.58        | -          |
| VC1905  | 0.32        | -          |
| VC1911  | -           | 1.92       |
| VC1915  | -           | 0.36       |
| VC1916  | 1.62        | -          |
| VC1918  | -           | 1.77       |
| VC1920  | -           | 1.87       |
| VC1922  | -           | 1.59       |
| VC1935  | 1.90        | -          |
| VC1936  | 1.87        | -          |
| VC1937  | 1.92        | 2.11       |
| VC1943  | 0.56        | -          |
| VC1945  | -           | 1.74       |
| VC1946  | 3.08        | -          |
| VC1947  | 2.41        | 2.27       |
| VC1956  | -           | 1.55       |
| VC1957  | -           | 1.56       |
| VC1962  | 1.95        | 2.52       |
| VC1965  | -           | 1.54       |
| VC1973  | -           | 2.03       |
| VC1977  | 1.58        | -          |
| VC1983  | 0.45        | -          |
| VC1993  | 0.65        | -          |
| VC2002  | 0.30        | 1.74       |
| VC2006  | -           | 1.59       |
| VC2010  | 0.54        | -          |
| VC2011  | 0.66        | -          |
| VC2021  | -           | 1.69       |
| VC2030  | -           | 1.63       |
| VC2033  | 0.61        | -          |
| VC2036  | 0.55        | -          |
| VC2037  | 1.59        | 1.56       |
| VC2039  | -           | 1.71       |
| VC2040  | -           | 1.52       |
| VC2046  | 0.46        | -          |
| VC2049  | -           | 1.66       |
| VC2059  | 0.62        | -          |
| VC2062  | 0.48        | -          |
| VC2063  | 0.51        | -          |
| VC2064  | 0.55        | -          |

| Gene ID | Exponential | Stationary |
|---------|-------------|------------|
| VC2067  | 0.62        | -          |
| VC2068  | 0.33        | -          |
| VC2069  | 0.58        | -          |
| VC2074  | -           | 1.86       |
| VC2084  | 0.26        | 2.01       |
| VC2085  | 0.33        | -          |
| VC2086  | 0.36        | 1.82       |
| VC2087  | 0.44        | -          |
| VC2088  | 0.45        | -          |
| VC2089  | 0.49        | -          |
| VC2090  | 0.50        | -          |
| VC2091  | 0.54        | -          |
| VC2092  | 0.33        | 1.90       |
| VC2106  | 1.50        | 1.65       |
| VC2114  | 0.66        | -          |
| VC2116  | -           | 1.78       |
| VC2129  | 0.58        | -          |
| VC2130  | 0.66        | -          |
| VC2131  | 0.58        | -          |
| VC2132  | 0.65        | -          |
| VC2133  | 0.55        | -          |
| VC2134  | 0.43        | 1.69       |
| VC2136  | 0.64        | -          |
| VC2138  | 0.37        | -          |
| VC2139  | 0.45        | -          |
| VC2141  | 0.28        | -          |
| VC2142  | 0.15        | -          |
| VC2143  | 0.15        | -          |
| VC2144  | 0.21        | -          |
| VC2146  | 1.59        | -          |
| VC2149  | 0.40        | -          |
| VC2152  | 0.66        | -          |
| VC2157  | 0.65        | 1.65       |
| VC2161  | 0.25        | -          |
| VC2168  | -           | 1.70       |
| VC2183  | 0.59        | 1.61       |
| VC2187  | 0.22        | -          |
| VC2188  | 0.24        | -          |
| VC2189  | 0.08        | -          |
| VC2191  | 0.34        | -          |
| VC2195  | 0.33        | -          |
| VC2196  | 0.50        | -          |
| VC2197  | 0.25        | -          |
| VC2198  | 0.36        | -          |
| VC2199  | 0.48        | -          |
| VC2200  | 0.20        | -          |
| VC2206  | 0.43        | -          |

| Gene ID | Exponential | Stationary |
|---------|-------------|------------|
| VC2207  | 0.33        | -          |
| VC2212  | 2.82        | -          |
| VC2216  | 0.54        | -          |
| VC2221  | 0.32        | -          |
| VC2226  | 0.47        | -          |
| VC2227  | 0.50        | -          |
| VC2253  | 1.58        | -          |
| VC2282  | 0.65        | -          |
| VC2348  | 1.70        | -          |
| VC2349  | 1.70        | -          |
| VC2350  | 1.72        | -          |
| VC2357  | 0.50        | -          |
| VC2361  | 0.53        | -          |
| VC2362  | -           | 1.58       |
| VC2367  | 0.63        | 1.79       |
| VC2368  | -           | 2.02       |
| VC2372  | 0.61        | -          |
| VC2374  | 0.22        | -          |
| VC2376  | 0.56        | -          |
| VC2386  | -           | 2.80       |
| VC2389  | 0.34        | -          |
| VC2390  | 0.44        | 2.13       |
| VC2391  | 0.64        | -          |
| VC2412  | -           | 2.46       |
| VC2414  | -           | 1.54       |
| VC2443  | 1.63        | 1.56       |
| VC2466  | -           | 2.33       |
| VC2472  | -           | 2.12       |
| VC2481  | 0.35        | -          |
| VC2497  | -           | 1.98       |
| VC2509  | 0.42        | -          |
| VC2510  | 0.26        | 1.99       |
| VC2511  | 0.29        | -          |
| VC2512  | -           | 1.91       |
| VC2527  | -           | 1.58       |
| VC2530  | 0.55        | -          |
| VC2535  | -           | 1.69       |
| VC2543  | 0.40        | -          |
| VC2544  | 0.40        | -          |
| VC2546  | 0.55        | -          |
| VC2548  | -           | 1.95       |
| VC2607  | -           | 1.78       |
| VC2613  | 0.54        | -          |
| VC2614  | 0.64        | 2.32       |
| VC2615  | 0.41        | -          |
| VC2616  | 0.52        | 2.20       |
| VC2617  | 0.44        | -          |

| Gene ID | Exponential | Stationary |
|---------|-------------|------------|
| VC2618  | 0.32        | -          |
| VC2629  | 1.62        | -          |
| VC2647  | 2.56        | -          |
| VC2648  | 1.67        | -          |
| VC2650  | 1.67        | -          |
| VC2653  | -           | 1.86       |
| VC2654  | -           | 1.71       |
| VC2662  | -           | 2.21       |
| VC2664  | -           | 2.25       |
| VC2665  | -           | 3.00       |
| VC2667  | 1.97        | 2.35       |
| VC2669  | -           | 2.08       |
| VC2675  | -           | 1.63       |
| VC2681  | 1.80        | 1.73       |
| VC2698  | 1.96        | -          |
| VC2709  | 1.75        | -          |
| VC2717  | 0.31        | -          |
| VC2727  | 1.51        | -          |
| VC2728  | 1.68        | -          |
| VC2729  | 1.89        | -          |
| VC2730  | 1.85        | -          |
| VC2731  | 1.65        | -          |
| VC2738  | 0.54        | 2.27       |
| VC2746  | 0.42        | -          |
| VC2747  | 0.64        | -          |
| VC2751  | 1.50        | -          |
| VC2761  | 2.23        | -          |
| VC2764  | 0.65        | -          |
| VC2765  | -           | 1.62       |
| VC2767  | 0.63        | 2.23       |
| VCA0012 | 0.38        | -          |
| VCA0013 | 0.49        | -          |
| VCA0014 | 0.24        | -          |
| VCA0016 | 0.49        | -          |
| VCA0017 | 0.39        | 2.23       |
| VCA0022 | 0.57        | -          |
| VCA0030 | -           | 2.18       |
| VCA0037 | 0.55        | 1.87       |
| VCA0048 | 1.53        | -          |
| VCA0068 | 2.21        | -          |
| VCA0078 | 0.32        | -          |
| VCA0079 | -           | 1.73       |
| VCA0089 | -           | 0.63       |
| VCA0100 | 0.60        | -          |
| VCA0107 | 0.65        | -          |
| VCA0108 | 0.59        | -          |
| VCA0109 | 0.59        | -          |

| Gene ID | Exponential | Stationary |
|---------|-------------|------------|
| VCA0112 | 0.50        | -          |
| VCA0114 | 0.65        | -          |
| VCA0124 | -           | 2.00       |
| VCA0125 | -           | 1.79       |
| VCA0130 | 0.55        | -          |
| VCA0136 | 0.54        | -          |
| VCA0139 | 9.34        | 1.72       |
| VCA0166 | -           | 1.92       |
| VCA0167 | -           | 1.97       |
| VCA0172 | 1.65        | -          |
| VCA0179 | 2.19        | -          |
| VCA0184 | 1.62        | -          |
| VCA0194 | -           | 0.66       |
| VCA0208 | -           | 0.54       |
| VCA0214 | 0.53        | -          |
| VCA0218 | 1.78        | -          |
| VCA0219 | 1.73        | -          |
| VCA0223 | 0.27        | -          |
| VCA0224 | 0.57        | -          |
| VCA0227 | -           | 2.47       |
| VCA0239 | 1.51        | -          |
| VCA0242 | 2.19        | -          |
| VCA0243 | 1.72        | -          |
| VCA0249 | 0.60        | -          |
| VCA0254 | 1.55        | -          |
| VCA0272 | 1.60        | -          |
| VCA0274 | -           | 1.87       |
| VCA0276 | 0.50        | -          |
| VCA0277 | 0.22        | -          |
| VCA0278 | 0.45        | -          |
| VCA0280 | 0.35        | -          |
| VCA0290 | -           | 0.41       |
| VCA0298 | 0.57        | -          |
| VCA0303 | 0.44        | -          |
| VCA0308 | 0.56        | -          |
| VCA0328 | 0.53        | -          |
| VCA0332 | -           | 1.71       |
| VCA0346 | 0.37        | -          |
| VCA0355 | 0.65        | -          |
| VCA0363 | 0.63        | -          |
| VCA0367 | 0.51        | -          |
| VCA0368 | 0.56        | -          |
| VCA0375 | 0.65        | -          |
| VCA0392 | -           | 1.51       |
| VCA0395 | 0.66        | -          |
| VCA0397 | 0.64        | -          |
| VCA0398 | 0.52        | -          |



| Gene ID | Exponential | Stationary |
|---------|-------------|------------|
| VCA0399 | 0.63        | -          |
| VCA0410 | 0.63        | 1.55       |
| VCA0433 | -           | 2.13       |
| VCA0436 | 0.65        | -          |
| VCA0439 | -           | 2.04       |
| VCA0441 | 0.54        | -          |
| VCA0446 | 0.59        | -          |
| VCA0447 | -           | 2.15       |
| VCA0448 | -           | 1.78       |
| VCA0450 | 0.65        | -          |
| VCA0455 | 0.42        | -          |
| VCA0463 | 0.54        | -          |
| VCA0464 | 0.45        | -          |
| VCA0465 | 0.41        | -          |
| VCA0516 | 14.71       | -          |
| VCA0517 | 3.47        | -          |
| VCA0518 | 5.20        | -          |
| VCA0519 | 3.00        | -          |
| VCA0523 | 0.62        | -          |
| VCA0536 | 0.21        | -          |
| VCA0563 | 0.63        | -          |
| VCA0565 | 1.54        | -          |
| VCA0569 | 0.65        | -          |
| VCA0573 | -           | 2.35       |
| VCA0577 | 1.84        | -          |
| VCA0592 | 0.58        | -          |
| VCA0597 | 1.66        | -          |
| VCA0609 | 0.46        | -          |
| VCA0611 | 1.90        | 2.72       |
| VCA0612 | 2.00        | 2.98       |
| VCA0623 | 1.72        | -          |
| VCA0631 | 0.46        | -          |
| VCA0632 | 0.59        | -          |
| VCA0643 | 0.41        | -          |
| VCA0645 | 1.54        | -          |
| VCA0653 | 1.71        | -          |
| VCA0662 | 1.63        | -          |
| VCA0663 | 0.66        | -          |
| VCA0688 | 0.60        | -          |
| VCA0689 | 0.52        | -          |
| VCA0690 | 0.47        | -          |
| VCA0691 | 0.47        | -          |
| VCA0697 | 0.37        | -          |
| VCA0711 | -           | 1.53       |
| VCA0712 | -           | 0.56       |
| VCA0721 | 1.52        | 1.61       |
| VCA0722 | 2.05        | -          |

| Gene ID | Exponential | Stationary |
|---------|-------------|------------|
| VCA0735 | 1.58        | -          |
| VCA0744 | 0.53        | -          |
| VCA0759 | 0.45        | -          |
| VCA0765 | -           | 1.51       |
| VCA0796 | -           | 1.52       |
| VCA0800 | -           | 1.94       |
| VCA0801 | 1.91        | -          |
| VCA0826 | 0.47        | -          |
| VCA0827 | 0.58        | -          |
| VCA0828 | -           | 2.29       |
| VCA0843 | 0.34        | -          |
| VCA0849 | -           | 1.76       |
| VCA0851 | 0.53        | -          |
| VCA0860 | 0.17        | -          |
| VCA0864 | 1.83        | -          |
| VCA0868 | 0.51        | -          |
| VCA0875 | 0.26        | -          |
| VCA0877 | 0.45        | -          |
| VCA0883 | 0.32        | -          |
| VCA0885 | 0.52        | -          |
| VCA0886 | 0.42        | 1.57       |
| VCA0896 | 0.66        | -          |
| VCA0897 | 0.60        | -          |
| VCA0899 | -           | 0.66       |
| VCA0916 | 2.75        | -          |
| VCA0917 | 2.64        | -          |
| VCA0918 | 2.75        | 1.72       |
| VCA0925 | 0.61        | -          |
| VCA0933 | 1.51        | -          |
| VCA0943 | 0.33        | -          |
| VCA0944 | 0.61        | -          |
| VCA0945 | 0.15        | -          |
| VCA0946 | 0.47        | -          |
| VCA0952 | 1.94        | 4.47       |
| VCA0958 | 0.53        | -          |
| VCA0959 | 1.63        | -          |
| VCA0962 | 1.73        | -          |
| VCA0978 | 0.63        | -          |
| VCA0994 | 0.36        | -          |
| VCA1000 | 1.99        | -          |
| VCA1025 | -           | 2.03       |
| VCA1027 | 0.47        | -          |
| VCA1028 | 0.19        | -          |
| VCA1030 | 1.75        | -          |
| VCA1031 | 2.13        | -          |
| VCA1050 | -           | 1.68       |
| VCA1065 | 0.66        | -          |

| <b>Gene ID</b> | <b>Exponential</b> | <b>Stationary</b> |
|----------------|--------------------|-------------------|
| VCA1070        | 1.90               | -                 |
| VCA1071        | 0.65               | -                 |
| VCA1072        | 0.65               | -                 |
| VCA1073        | 0.56               | -                 |
| VCA1075        | 0.28               | -                 |
| VCA1076        | 0.25               | -                 |
| VCA1082        | -                  | 1.65              |
| VCA1083        | -                  | 1.73              |
| VCA1085        | 0.64               | -                 |
| VCA1097        | 0.66               | -                 |
| VCA1113        | 0.63               | -                 |

**Supplementary Table 4.** Functional categories of the genes differentially regulated in the  $S\Delta cdgC$  mutant compared to the smooth wild type during exponential and stationary phases.<sup>a</sup>

| Category                                                  | Exponential |           |
|-----------------------------------------------------------|-------------|-----------|
|                                                           | Induced     | Repressed |
| Amino Acid Biosynthesis                                   | 0           | 0         |
| Biosynthesis of Cofactors, Prosthetic Groups and Carriers | 1           | 0         |
| Cell Envelope                                             | 8           | 0         |
| Cellular Processes                                        | 7           | 10        |
| Central Intermediary Metabolism                           | 4           | 0         |
| DNA Metabolism                                            | 0           | 0         |
| Energy Metabolism                                         | 8           | 0         |
| Fatty Acid and Phospholipid Metabolism                    | 1           | 0         |
| Hypothetical Proteins                                     | 19          | 9         |
| Protein Fate                                              | 2           | 0         |
| Protein Synthesis                                         | 0           | 0         |
| Purines, Pyrimidines, Nucleosides and Nucleotides         | 2           | 0         |
| Regulatory Functions                                      | 6           | 1         |
| Transcription                                             | 0           | 1         |
| Transport and Binding Proteins                            | 7           | 0         |
| Unknown Function                                          | 2           | 2         |
| Other Categories                                          | 4           | 0         |
| Total                                                     | 71          | 23        |

<sup>a</sup>Differentially expressed genes were determined using SAM software with  $\geq 1.5$  fold change in gene expression and False Discovery Rate (FDR)  $\leq 3\%$  as a criteria.

<sup>b</sup>Categories are as defined in the TIGR database for *Vibrio cholerae* strain N16961

**Supplementary Table 5.** Genes that are differentially expressed in  $S\Delta cdgC$  compared to wild-type smooth during both exponential and stationary phases of growth. Differentially expressed genes were determined using SAM software with  $\geq 1.5$  fold change in gene expression and False Discovery Rate (FDR)  $\leq 3\%$  as a criteria.

| Gene ID | Exponential |
|---------|-------------|
| VC0010  | 2.16        |
| VC0157  | 2.49        |
| VC0175  | 0.64        |
| VC0184  | 0.48        |
| VC0194  | 1.80        |
| VC0284  | 1.57        |
| VC0385  | 1.63        |
| VC0430  | 1.51        |
| VC0492  | 0.60        |
| VC0665  | 2.13        |
| VC0704  | 1.52        |
| VC0767  | 1.54        |
| VC0825  | 0.63        |
| VC0828  | 0.57        |
| VC0830  | 0.58        |
| VC0831  | 0.65        |
| VC0832  | 0.66        |
| VC0833  | 0.59        |
| VC0835  | 0.64        |
| VC0838  | 0.61        |
| VC0839  | 0.66        |
| VC0916  | 2.03        |
| VC0917  | 2.63        |
| VC0918  | 3.10        |
| VC0919  | 2.63        |
| VC0920  | 1.54        |
| VC0922  | 1.99        |
| VC0924  | 2.26        |
| VC0925  | 2.28        |
| VC0926  | 2.73        |
| VC0927  | 2.32        |
| VC0928  | 2.42        |
| VC0930  | 2.76        |
| VC0931  | 3.37        |
| VC0932  | 4.99        |
| VC0933  | 4.61        |
| VC0935  | 4.88        |
| VC0936  | 4.94        |
| VC0937  | 2.86        |
| VC1080  | 0.56        |
| VC1185  | 0.64        |
| VC1235  | 1.59        |

|         |      |
|---------|------|
| VC1313  | 1.52 |
| VC1538  | 0.64 |
| VC1584  | 1.66 |
| VC1585  | 1.86 |
| VC1620  | 0.64 |
| VC1644  | 1.61 |
| VC1760  | 0.65 |
| VC1762  | 0.59 |
| VC1827  | 1.81 |
| VC1888  | 4.84 |
| VC1905  | 1.54 |
| VC1935  | 2.35 |
| VC1949  | 1.82 |
| VC2006  | 0.64 |
| VC2615  | 1.89 |
| VC2667  | 1.52 |
| VC2724  | 1.57 |
| VC2725  | 1.50 |
| VC2747  | 1.57 |
| VC2749  | 1.92 |
| VC2751  | 1.51 |
| VCA0013 | 1.59 |
| VCA0014 | 2.32 |
| VCA0017 | 1.55 |
| VCA0035 | 1.53 |
| VCA0055 | 1.65 |
| VCA0075 | 1.78 |
| VCA0114 | 1.64 |
| VCA0218 | 1.90 |
| VCA0219 | 2.31 |
| VCA0231 | 1.53 |
| VCA0238 | 1.55 |
| VCA0276 | 1.73 |
| VCA0375 | 0.61 |
| VCA0390 | 0.66 |
| VCA0645 | 1.89 |
| VCA0685 | 2.04 |
| VCA0697 | 0.61 |
| VCA0721 | 1.62 |
| VCA0811 | 1.58 |
| VCA0843 | 1.66 |
| VCA0849 | 2.13 |
| VCA0864 | 1.60 |

| VCA0875 | 2.11       |
|---------|------------|
| VCA0887 | 1.50       |
| VCA0888 | 1.65       |
| VCA0943 | 1.78       |
| VCA0944 | 1.80       |
| VCA0952 | 2.59       |
| VCA0962 | 1.58       |
| VCA1069 | 1.67       |
| VCA1075 | 0.64       |
| Gene ID | Stationary |
| VC1468  | 0.66       |
| VC1636  | 0.64       |
| VC1814  | 0.58       |
| VC2287  | 0.62       |

**Supplementary Table 6.** Functional categories of the genes differentially regulated in the  $R\Delta mbaA$  mutant compared to the rugose wild type during exponential and stationary phases of growth.<sup>a</sup>

| Category <sup>b</sup>                                     | Exponential |           | Stationary |           |
|-----------------------------------------------------------|-------------|-----------|------------|-----------|
|                                                           | Induced     | Repressed | Induced    | Repressed |
| Amino Acid Biosynthesis                                   | 0           | 9         | 7          | 0         |
| Biosynthesis of Cofactors, Prosthetic Groups and Carriers | 0           | 2         | 0          | 0         |
| Cell Envelope                                             | 0           | 1         | 6          | 0         |
| Cellular Processes                                        | 4           | 11        | 4          | 4         |
| Central Intermediary Metabolism                           | 1           | 1         | 5          | 0         |
| DNA Metabolism                                            | 1           | 0         | 1          | 0         |
| Energy Metabolism                                         | 3           | 18        | 9          | 0         |
| Fatty Acid and Phospholipid Metabolism                    | 0           | 1         | 0          | 0         |
| Hypothetical Proteins                                     | 33          | 28        | 45         | 4         |
| Protein Fate                                              | 1           | 1         | 9          | 0         |
| Protein Synthesis                                         | 1           | 1         | 1          | 0         |
| Purines, Pyrimidines, Nucleosides and Nucleotides         | 3           | 11        | 1          | 0         |
| Regulatory Functions                                      | 8           | 9         | 6          | 0         |
| Transcription                                             | 0           | 0         | 0          | 0         |
| Transport and Binding Proteins                            | 10          | 20        | 7          | 0         |
| Unknown Function                                          | 3           | 6         | 7          | 0         |
| Other Categories                                          | 5           | 0         | 4          | 0         |
| Total                                                     | 73          | 119       | 112        | 8         |

<sup>a</sup>Differentially expressed genes were determined using SAM software with  $\geq 1.5$  fold change in gene expression and False Discovery Rate (FDR)  $\leq 3\%$  as a criteria.

<sup>b</sup>Categories are as defined in the TIGR database for *Vibrio cholerae* strain N16961

**Supplementary Table 7.** Genes that are differentially expressed in  $R\Delta mb a A$  compared to wild-type rugose during both exponential and stationary phases of growth. Differentially expressed genes were determined using SAM software with  $\geq 1.5$  fold change in gene expression and False Discovery Rate (FDR)  $\leq 3\%$  as a criteria.

| Gene ID | Exponential | Stationary |
|---------|-------------|------------|
| VC0016  | -           | 8.56       |
| VC0017  | -           | 4.02       |
| VC0018  | -           | 2.01       |
| VC0025  | -           | 7.41       |
| VC0030  | -           | 1.90       |
| VC0036  | 0.65        | -          |
| VC0051  | 0.62        | -          |
| VC0052  | 0.63        | -          |
| VC0076  | 0.48        | -          |
| VC0157  | -           | 4.38       |
| VC0170  | 0.64        | -          |
| VC0171  | 0.39        | 1.89       |
| VC0172  | 0.34        | -          |
| VC0176  | 1.71        | -          |
| VC0177  | 1.73        | -          |
| VC0185  | 1.89        | -          |
| VC0258  | -           | 1.64       |
| VC0273  | 1.70        | -          |
| VC0278  | 1.75        | -          |
| VC0330  | 0.57        | -          |
| VC0346  | -           | 2.10       |
| VC0349  | -           | 2.31       |
| VC0363  | 1.60        | -          |
| VC0364  | 2.18        | -          |
| VC0378  | -           | 1.72       |
| VC0431  | -           | 1.53       |
| VC0432  | 0.57        | -          |
| VC0465  | 0.48        | -          |
| VC0475  | 0.66        | -          |
| VC0481  | 0.46        | -          |
| VC0551  | 0.54        | -          |
| VC0553  | -           | 1.55       |
| VC0583  | 0.62        | -          |
| VC0604  | 0.51        | -          |
| VC0635  | 1.99        | -          |
| VC0667  | 0.53        | -          |
| VC0702  | 0.48        | -          |
| VC0707  | 2.39        | -          |
| VC0714  | -           | 1.74       |
| VC0715  | -           | 1.64       |
| VC0730  | 0.57        | -          |
| VC0731  | 0.62        | -          |

| Gene ID | Exponential | Stationary |
|---------|-------------|------------|
| VC0749  | 0.66        | 1.76       |
| VC0784  | -           | 2.23       |
| VC0786  | -           | 3.48       |
| VC0827  | -           | 1.62       |
| VC0832  | 1.68        | -          |
| VC0838  | 1.61        | -          |
| VC0854  | -           | 1.58       |
| VC0869  | 0.65        | -          |
| VC0905  | 0.64        | -          |
| VC0916  | -           | 2.53       |
| VC0917  | -           | 1.90       |
| VC0918  | -           | 3.54       |
| VC0919  | -           | 3.25       |
| VC0922  | -           | 3.83       |
| VC0924  | -           | 2.07       |
| VC0925  | -           | 3.61       |
| VC0926  | -           | 4.40       |
| VC0928  | -           | 4.73       |
| VC0929  | -           | 2.44       |
| VC0930  | -           | 3.39       |
| VC0932  | -           | 4.22       |
| VC0933  | -           | 4.24       |
| VC0935  | -           | 5.14       |
| VC0936  | -           | 1.82       |
| VC0942  | -           | 1.54       |
| VC0961  | -           | 1.92       |
| VC0991  | 0.16        | -          |
| VC1004  | 0.58        | -          |
| VC1031  | -           | 2.68       |
| VC1034  | 1.63        | -          |
| VC1048  | -           | 1.61       |
| VC1051  | 1.61        | -          |
| VC1080  | 0.49        | -          |
| VC1082  | 0.57        | -          |
| VC1091  | 0.34        | 3.24       |
| VC1095  | 0.31        | -          |
| VC1101  | -           | 1.76       |
| VC1141  | 0.48        | -          |
| VC1143  | -           | 1.83       |
| VC1150  | 0.61        | -          |
| VC1168  | 0.60        | -          |
| VC1172  | -           | 1.56       |

| Gene ID | Exponential | Stationary |
|---------|-------------|------------|
| VC1175  | 0.47        | -          |
| VC1183  | -           | 2.77       |
| VC1190  | 0.57        | -          |
| VC1193  | 1.59        | -          |
| VC1197  | -           | 1.84       |
| VC1206  | -           | 1.60       |
| VC1231  | 2.26        | -          |
| VC1242  | 0.59        | -          |
| VC1247  | 1.52        | -          |
| VC1277  | 0.53        | -          |
| VC1293  | 0.51        | -          |
| VC1313  | -           | 1.69       |
| VC1317  | 1.52        | -          |
| VC1329  | 1.87        | -          |
| VC1344  | -           | 4.54       |
| VC1345  | -           | 4.82       |
| VC1346  | -           | 4.31       |
| VC1347  | -           | 2.44       |
| VC1358  | -           | 2.00       |
| VC1409  | 1.69        | -          |
| VC1415  | 0.56        | -          |
| VC1421  | 0.55        | -          |
| VC1455  | 1.51        | -          |
| VC1466  | 1.52        | -          |
| VC1470  | 1.52        | 1.62       |
| VC1477  | 1.61        | -          |
| VC1490  | -           | 1.96       |
| VC1494  | 0.66        | -          |
| VC1510  | 0.60        | -          |
| VC1514  | 0.62        | -          |
| VC1620  | 0.51        | -          |
| VC1621  | -           | 2.25       |
| VC1622  | -           | 2.26       |
| VC1633  | -           | 1.78       |
| VC1645  | 0.55        | -          |
| VC1677  | -           | 1.88       |
| VC1690  | 0.66        | -          |
| VC1699  | 0.57        | -          |
| VC1727  | -           | 1.92       |
| VC1737  | 1.69        | -          |
| VC1742  | 1.65        | -          |
| VC1823  | 0.59        | -          |
| VC1860  | -           | 1.91       |
| VC1861  | 0.48        | -          |
| VC1863  | -           | 1.87       |
| VC1888  | -           | 5.10       |
| VC1898  | 0.54        | -          |

| Gene ID | Exponential | Stationary |
|---------|-------------|------------|
| VC1911  | 0.59        | -          |
| VC1942  | 0.65        | -          |
| VC1943  | 0.64        | -          |
| VC1947  | -           | 2.14       |
| VC1962  | -           | 1.94       |
| VC2002  | 0.44        | -          |
| VC2012  | -           | 3.47       |
| VC2045  | 0.62        | -          |
| VC2078  | 1.84        | -          |
| VC2079  | -           | 1.77       |
| VC2084  | 0.49        | -          |
| VC2085  | 0.56        | -          |
| VC2086  | 0.63        | -          |
| VC2088  | 0.62        | -          |
| VC2092  | 0.44        | -          |
| VC2101  | 1.83        | -          |
| VC2106  | -           | 1.68       |
| VC2114  | 0.62        | -          |
| VC2141  | 0.66        | -          |
| VC2142  | 0.62        | -          |
| VC2143  | -           | 0.36       |
| VC2159  | 0.58        | -          |
| VC2161  | 0.62        | -          |
| VC2187  | 0.65        | 0.24       |
| VC2188  | -           | 0.37       |
| VC2189  | -           | 0.29       |
| VC2200  | -           | 0.54       |
| VC2216  | 0.64        | -          |
| VC2226  | 0.62        | -          |
| VC2227  | 0.66        | -          |
| VC2228  | -           | 1.76       |
| VC2326  | 1.50        | -          |
| VC2362  | -           | 1.93       |
| VC2364  | -           | 1.62       |
| VC2374  | 0.41        | -          |
| VC2376  | 0.65        | -          |
| VC2481  | 0.62        | -          |
| VC2482  | -           | 1.72       |
| VC2483  | -           | 1.72       |
| VC2509  | 0.62        | -          |
| VC2510  | 0.60        | -          |
| VC2511  | 0.63        | -          |
| VC2530  | 0.64        | -          |
| VC2544  | 0.63        | -          |
| VC2607  | -           | 2.03       |
| VC2614  | 0.64        | -          |
| VC2616  | -           | 3.52       |

| Gene ID | Exponential | Stationary |
|---------|-------------|------------|
| VC2618  | -           | 2.43       |
| VC2647  | 1.70        | -          |
| VC2650  | 1.72        | -          |
| VC2665  | -           | 2.59       |
| VC2717  | 0.63        | 0.42       |
| VC2725  | -           | 1.65       |
| VC2730  | -           | 1.82       |
| VC2746  | 0.59        | -          |
| VC2756  | 1.55        | -          |
| VC2761  | 1.62        | -          |
| VCA0001 | -           | 1.79       |
| VCA0012 | 0.48        | -          |
| VCA0017 | 0.59        | -          |
| VCA0022 | 0.64        | -          |
| VCA0078 | -           | 2.06       |
| VCA0080 | -           | 2.28       |
| VCA0124 | -           | 1.94       |
| VCA0125 | 1.62        | 1.59       |
| VCA0139 | 2.56        | -          |
| VCA0167 | -           | 1.66       |
| VCA0172 | 1.54        | -          |
| VCA0177 | 1.75        | -          |
| VCA0184 | 1.82        | -          |
| VCA0203 | 1.54        | -          |
| VCA0214 | 0.47        | -          |
| VCA0220 | -           | 2.48       |
| VCA0223 | -           | 2.81       |
| VCA0274 | -           | 1.88       |
| VCA0280 | 0.47        | -          |
| VCA0332 | -           | 1.91       |
| VCA0333 | -           | 1.94       |
| VCA0469 | -           | 1.60       |
| VCA0475 | 1.55        | -          |
| VCA0497 | -           | 1.55       |
| VCA0516 | 2.35        | -          |
| VCA0517 | 1.60        | -          |
| VCA0519 | 1.56        | -          |
| VCA0531 | 1.80        | -          |
| VCA0536 | 0.48        | -          |

| Gene ID | Exponential | Stationary |
|---------|-------------|------------|
| VCA0555 | 1.74        | -          |
| VCA0570 | 1.66        | 1.94       |
| VCA0571 | 1.54        | 1.97       |
| VCA0597 | 1.63        | -          |
| VCA0611 | -           | 2.38       |
| VCA0612 | -           | 2.65       |
| VCA0616 | 0.64        | -          |
| VCA0648 | -           | 2.52       |
| VCA0650 | -           | 1.72       |
| VCA0742 | 1.86        | -          |
| VCA0750 | 1.60        | -          |
| VCA0783 | -           | 1.59       |
| VCA0794 | 1.70        | -          |
| VCA0796 | 2.57        | 1.50       |
| VCA0801 | 1.80        | -          |
| VCA0812 | -           | 2.55       |
| VCA0813 | -           | 5.74       |
| VCA0828 | -           | 4.63       |
| VCA0829 | -           | 3.22       |
| VCA0840 | -           | 1.56       |
| VCA0843 | 0.60        | -          |
| VCA0845 | -           | 1.60       |
| VCA0849 | -           | 2.50       |
| VCA0880 | -           | 4.42       |
| VCA0881 | -           | 2.63       |
| VCA0883 | 0.48        | -          |
| VCA0886 | 0.56        | -          |
| VCA0899 | -           | 0.59       |
| VCA0934 | 1.80        | -          |
| VCA0952 | 2.01        | 5.15       |
| VCA0959 | 1.53        | -          |
| VCA0975 | -           | 1.80       |
| VCA1000 | -           | 0.43       |
| VCA1035 | 0.61        | -          |
| VCA1075 | 0.59        | -          |
| VCA1076 | 0.55        | -          |
| VCA1082 | -           | 1.95       |
| VCA1083 | -           | 2.11       |
